# Supplementary material for: Preeclampsia and Blood Pressure Trajectory during Pregnancy in Relation to Vitamin D Status
Source: PubMed Central journal article supplement (PMC4811441; doi:10.1371/journal.pone.0152198), 2016-03-29
Supplement: pone.0152198.s001.pdf [file pone.0152198.s001.pdf]

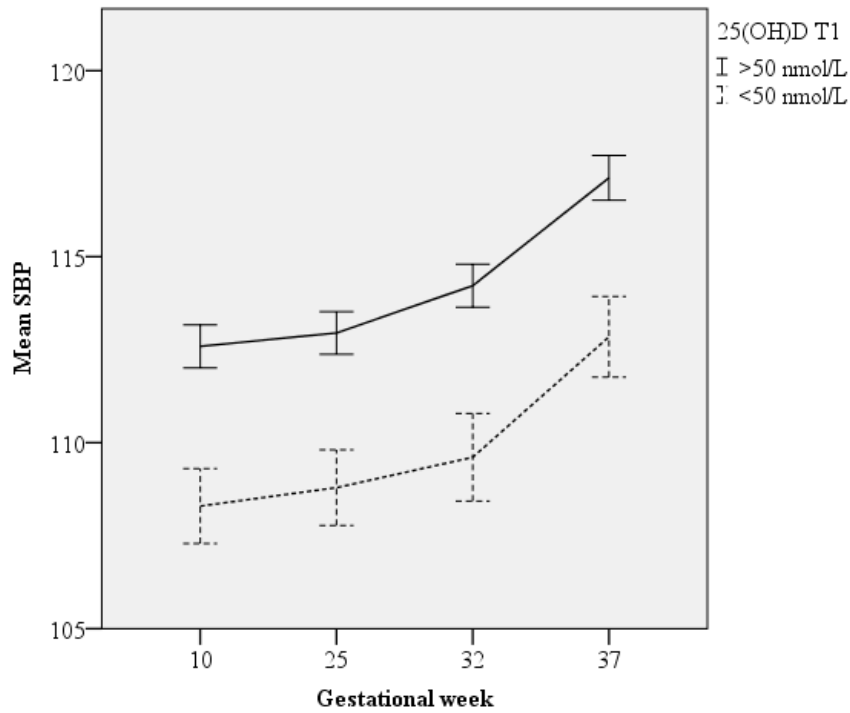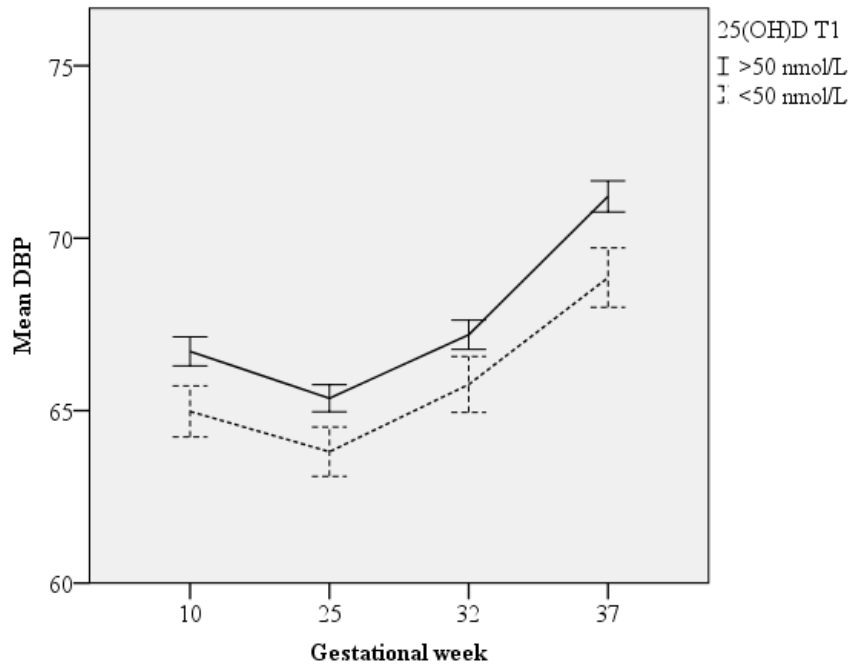

S1 Figure. Systolic (SBP) and diastolic blood pressure (DBP) trajectory in pregnancy, grouped by serum 25-hydroxyvitamin D (25(OH)D) at baseline (T1). Dashed line represents 25(OH)D < 50 nmol/L (N=497) and continuous line represents 25(OH)D ≥ 50 nmol/L (N=1496). Error bars represent 95% CI.
